# Supplementary material for: CO oxidation over MOx (M = Mn, Fe, Co, Ni, Cu) supported on SmMn2O5 composite catalysts
Source: Royal Society of Chemistry journal article supplement (doi:10.1039/c8cy01263f), 2018-01-01
Supplement: c8cy01263f1.pdf [file c8cy01263f1.pdf]

## Supporting Information

### **CO oxidation over MO<sub>x</sub> (M = Mn, Fe, Co, Ni, Cu) supported on SmMn<sub>2</sub>O<sub>5</sub> composite catalysts**

Yun Lang,<sup>a</sup> Jie Zhang,<sup>a</sup> Zijian Feng,<sup>a</sup> Xiao Liu,<sup>b</sup> Yuning Zhu,<sup>a</sup> Tao Zeng,<sup>a</sup> Yunkun Zhao,<sup>c</sup>  
Rong Chen<sup>b</sup> and Bin Shan<sup>\*a</sup>

<sup>a</sup> State Key Laboratory of Materials Processing and Die and Mould Technology, School of Materials Science and Engineering, Huazhong University of Science and Technology, Wuhan 430074, Hubei, People's Republic of China

\*E-mail: bshan@mail.hust.edu.cn

<sup>b</sup> State Key Laboratory of Digital Manufacturing Equipment and Technology, School of Mechanical Science and Engineering, Huazhong University of Science and Technology, Wuhan 430074, Hubei, People's Republic of China

<sup>c</sup> State Key Laboratory of Advanced Technologies for Comprehensive Utilization of Platinum Metal, Kunming Institute of Precious Metals, Kunming 650106, Yunnan, China.

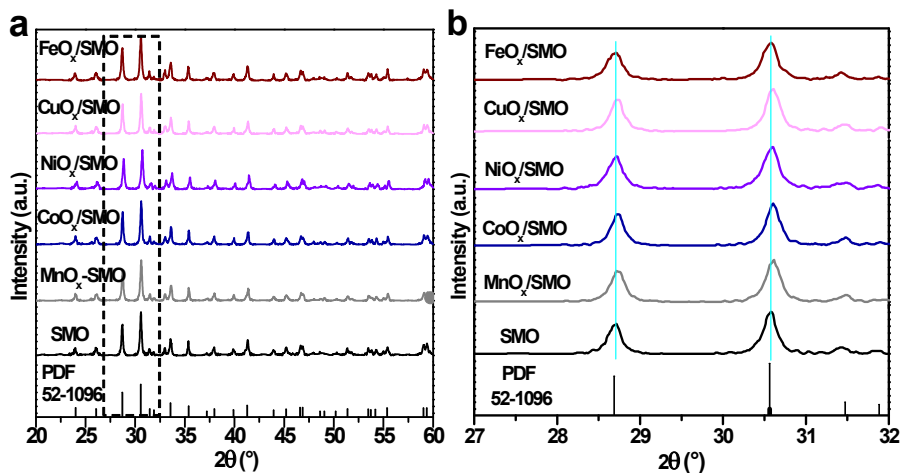

Fig. S1 (a) XRD patterns of all  $MO_x/SMO$  samples; (b) corresponding enlarged figures.

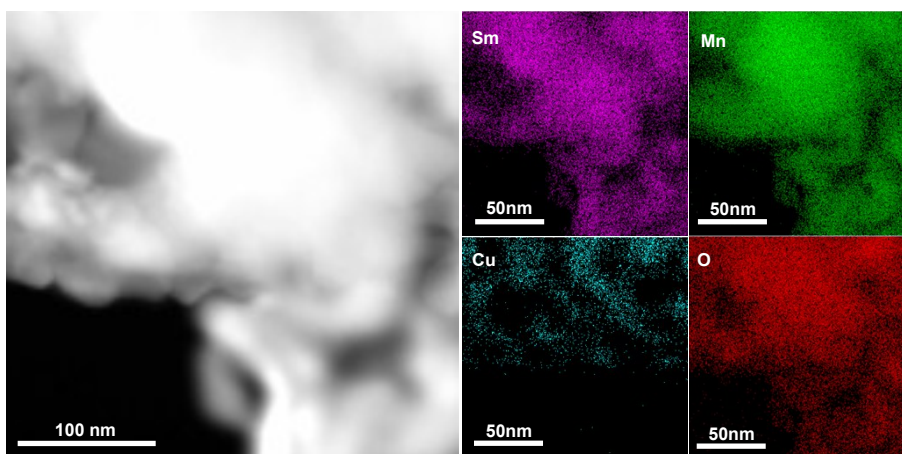

Fig. S2 Dark field STEM and EDX-mapping images of  $CuO_x/SMO$  sample.

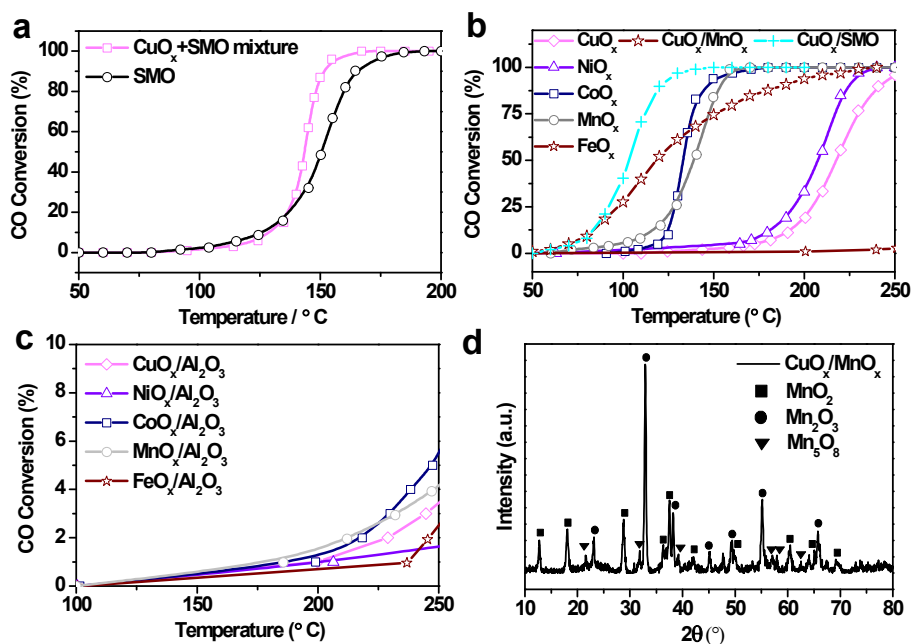

**Fig. S3** Light off CO oxidation curves of (a) 1 wt.% CuO<sub>x</sub> + SMO mechanical mixture and pure SMO; (b) pure MO<sub>x</sub>, 1 wt.% CuO<sub>x</sub>/MnO<sub>x</sub> and 1 wt.% CuO<sub>x</sub>/SMO; (c) 1 wt.% MO<sub>x</sub>/Al<sub>2</sub>O<sub>3</sub> samples, below 200 °C, CO conversion of MO<sub>x</sub>/Al<sub>2</sub>O<sub>3</sub> samples is negligible (<2%), which suggests that MO<sub>x</sub> surface is not the active center for CO oxidation over MO<sub>x</sub>/SMO composites; (d) XRD pattern of 1 wt.% CuO<sub>x</sub>/MnO<sub>x</sub> sample, the peaks of Cu or Cu<sub>2</sub>O can't be detected in the pattern, as the same as the MO<sub>x</sub>/SMO samples.

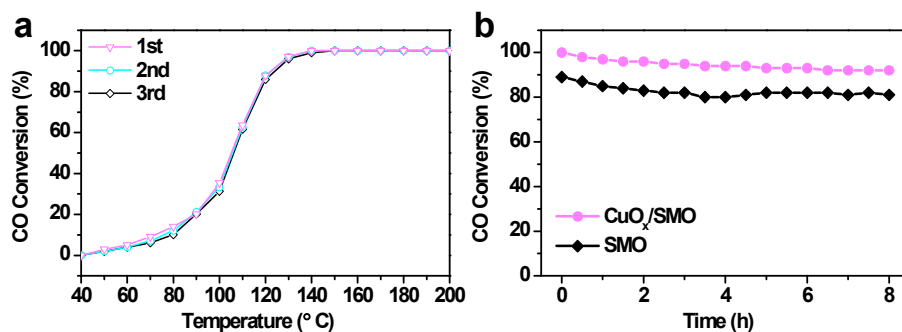

**Fig. S4** (a) Reusability test for CO oxidation over CuO<sub>x</sub>/SMO, the sample had been repeatedly tested for three times; (b) catalytic performance at 160 °C for CO oxidation versus time on line over the CuO<sub>x</sub>/SMO and bare SMO, the feed gas was the same with that in the activity tests (1.3 %CO/10 %O<sub>2</sub>/N<sub>2</sub> at 100 ml min<sup>-1</sup>, with a space velocity of 120000 ml g<sup>-1</sup> h<sup>-1</sup>).

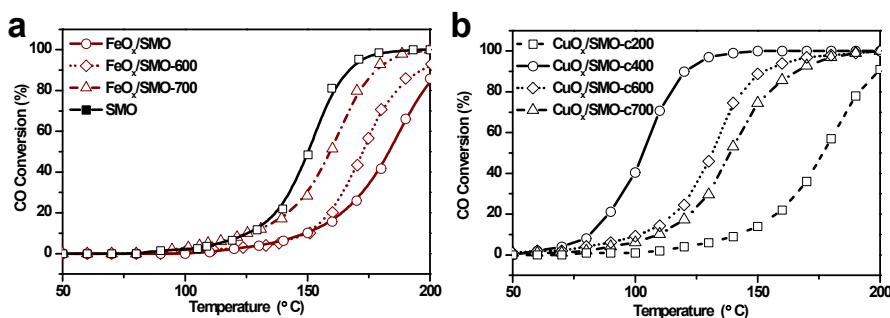

**Fig. S5** Light off CO oxidation curves of (a) FeO<sub>x</sub>/SMO, FeO<sub>x</sub>/SMO-600, FeO<sub>x</sub>/SMO-700 and bare SMO, where FeO<sub>x</sub>/SMO-600 and FeO<sub>x</sub>/SMO-700 are ascribed to FeO<sub>x</sub>/SMO samples annealed at 600 and 700 °C in static air for 2h; (b) CuO<sub>x</sub>/SMO samples which were calcined at 400, 600 and 700 °C for 4h after the precipitation process (in the catalysts preparation).

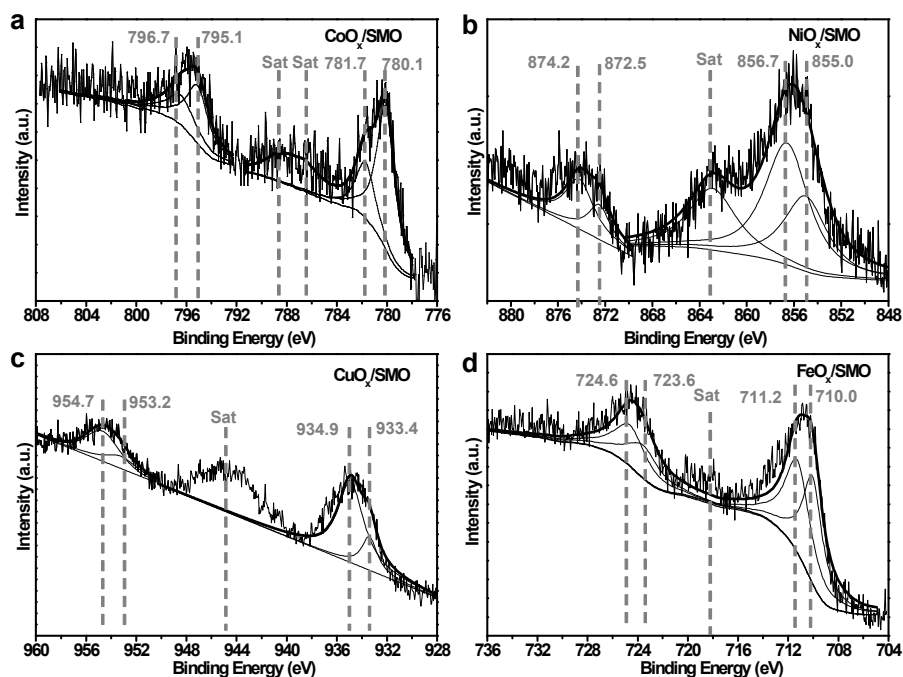

**Fig. S6** XPS patterns of (a) Co 2p (b) Ni 2p (c) Cu 2p (d) Fe 2p over  $\text{MO}_x/\text{SMO}$  samples. Sat stand for the satellite peak.

The XPS pattern of Co, Ni and Cu in  $\text{MO}_x/\text{SMO}$  is given in Fig. S4. For Co 2p core levels, peak at 780.1 and 795.1 eV is assigned to  $\text{Co}^{3+}$ , the 781.7 and 796.7 eV is assigned to  $\text{Co}^{2+}$ .<sup>1</sup> For Ni 2p core levels, peak at 855.0 and 872.5 eV is assigned to  $\text{Ni}^{2+}$ , the 856.7 and 874.2 eV is assigned to  $\text{Ni}^{3+}$ .<sup>2,3</sup> For Cu 2p core levels, peak at 933.4 and 953.2 eV is assigned to  $\text{Cu}^+$ , the 934.9 and 954.7 eV is assigned to  $\text{Cu}^{2+}$ .<sup>4,5</sup> For Fe 2p core levels, peak at 710.0 and 723.6 eV is assigned to  $\text{Fe}^{2+}$ , the 711.2 and 724.6 eV and is assigned to  $\text{Fe}^{3+}$ .<sup>6,7</sup>

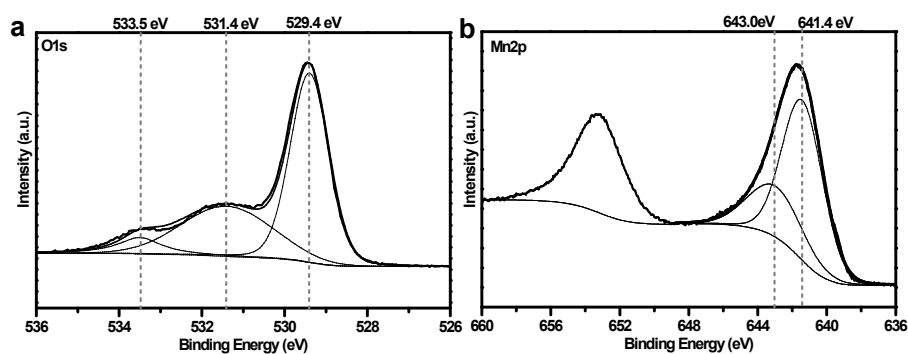

**Fig. S7** XPS patterns of pure  $\text{MnO}_x$ .

The XPS pattern of Mn 2p and O 1s over pure  $\text{MnO}_x$  is shown in Fig. S5. Peak at 641.4 eV is identified as  $\text{Mn}^{3+}$  and the 643.0 eV is referred to  $\text{Mn}^{4+}$ . The atomic ratio of  $\text{Mn}^{4+}/\text{Mn}^{3+}$  in  $\text{MnO}_x$  is 0.43, the molar ratio of  $\text{O}_{\text{ads}}/\text{O}_{\text{latt}}$  is 0.59. For either  $\text{MnO}_x$  or bare SMO, their  $\text{Mn}^{4+}/\text{Mn}^{3+}$  atomic ratio is much lower than that of  $\text{MnO}_x/\text{SMO}$  catalyst.

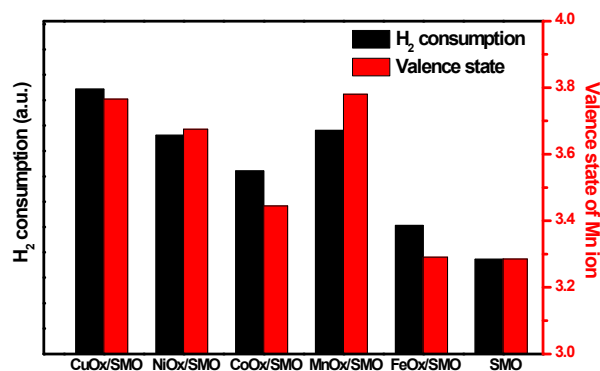

Fig. S8 H<sub>2</sub> consumptions in the reduction process of “Mn<sup>4+</sup> to Mn<sup>3+</sup>” and the average valence states of Mn ion over the MO<sub>x</sub>/SMO composites and pure SMO sample.

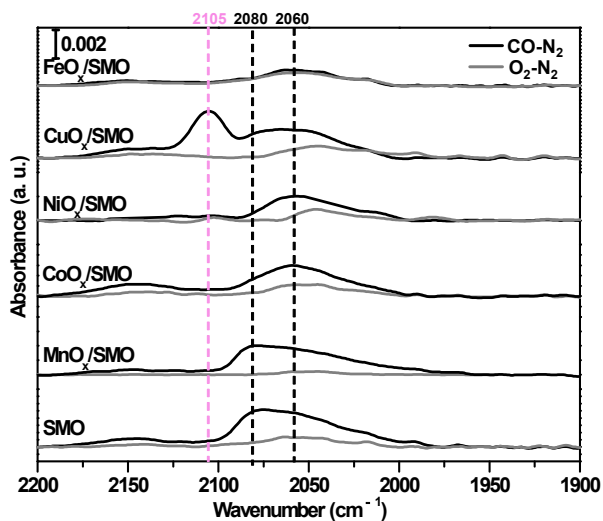

Fig. S9 linear CO adsorption spectra of MO<sub>x</sub>/SMO and SMO.

Linear CO adsorption spectrum of MO<sub>x</sub>/SMO series catalysts is shown in Fig. S6. The CO adsorption band on Mn can be observed over all SMO samples, which is located around 2080<sup>1</sup> and 2060<sup>1</sup> cm<sup>-1</sup><sup>8,9</sup>. Among loaded MO<sub>x</sub>/SMO, additional linear CO adsorption only appears over CuO<sub>x</sub>-SMO catalyst at 2105<sup>1</sup> cm<sup>-1</sup>, it's indicated by CO adsorption on Cu<sup>+</sup><sup>10,11</sup>.

- 
- 1 L. Fu, Z. Liu, Y. Liu, B. Han, P. Hu, L. Cao, D. Zhu, *Adv. Mater.*, 2005, 17, 217-221.
  - 2 A. R. Gonzalez-Elipe, J. P. Holgado, R. Alvarez, C. Munuera, *J. Phys. Chem.*, 1992, 96, 3080-3086.
  - 3 A. F. Carley, S. D. Jackson, J. N. O'Shea, M. W. Roberts, *Surf. Sci.*, 1999, 440, 868-874.
  - 4 H. Einaga, A. Kiya, S. Yoshioka, Y. Teraoka., *Catal. Sci. Technol.*, 2014, 4, 3713-3722.
  - 5 S. Sun, D. Mao, J. Yu, Z. Yang, G. Lu, Z. Ma, *Catal. Sci. Technol.*, 2015, 5, 3166-3181
  - 6 H. Einaga, A. Kiya, S. Yoshioka, Y. Teraoka., *Catal. Sci. Technol.*, 2014, 4, 3713-3722.
  - 7 S. Sun, D. Mao, J. Yu, Z. Yang, G. Lu, Z. Ma, *Catal. Sci. Technol.*, 2015, 5, 3166-3181
  - 8 L. Cai, Z. H. Hu, P. Branton, W. Li, *Chinese J. Catal.*, 2014, 35, 159-167.
  - 9 B. D. Adams, R. M. Asmussen, A. Chen, R. C. Mawhinney, *Can. J. Chem.*, 2011, 89, 1445-1456.
  - 10 W.W. Wang, W.Z. Yu, P.P. Du, H. Xu, Z. Jin, R. Si, C. Ma, S. Shi, C.J. Jia, C.H. Yan, *ACS Catal.*, 2017, 7, 1313-1329.
  - 11 Y. Tang, L. Dong, C. Deng, M. Huang, B. Li, H. Zhang, *Catal. Commun.*, 2016, 78, 33-36.
